# Supplementary material
Source: publisher figshare collection journal article supplement (https://sage.figshare.com/ndownloader/files/15111674)
Supplement: Supplementary file 1 [file 15111674]

## **Appendix E:**

### Key transcription conventions

(.) Brief pause (under one second)

... text elided by the authors

(( )) Description of prosody or non-verbal activity

[ ] authors' comments or translation

?: unidentified speaker

- a hyphen indicates an abrupt cut-off

underlined words indicate marked stress relative to the surrounding speech.
